# Supplementary material for: NIR-Emitting Alloyed CdTeSe QDs and Organic Dye Assemblies: A Nontoxic, Stable, and Efficient FRET System
Source: MDPI journal article supplement (doi:10.3390/nano8040231), 2018-04-11
Supplement: s1 [file s1]

## Supporting Information

### NIR-Emitting Alloyed CdTeSe QDs and Organic Dye Assemblies: A Nontoxic, Stable, and Efficient FRET System

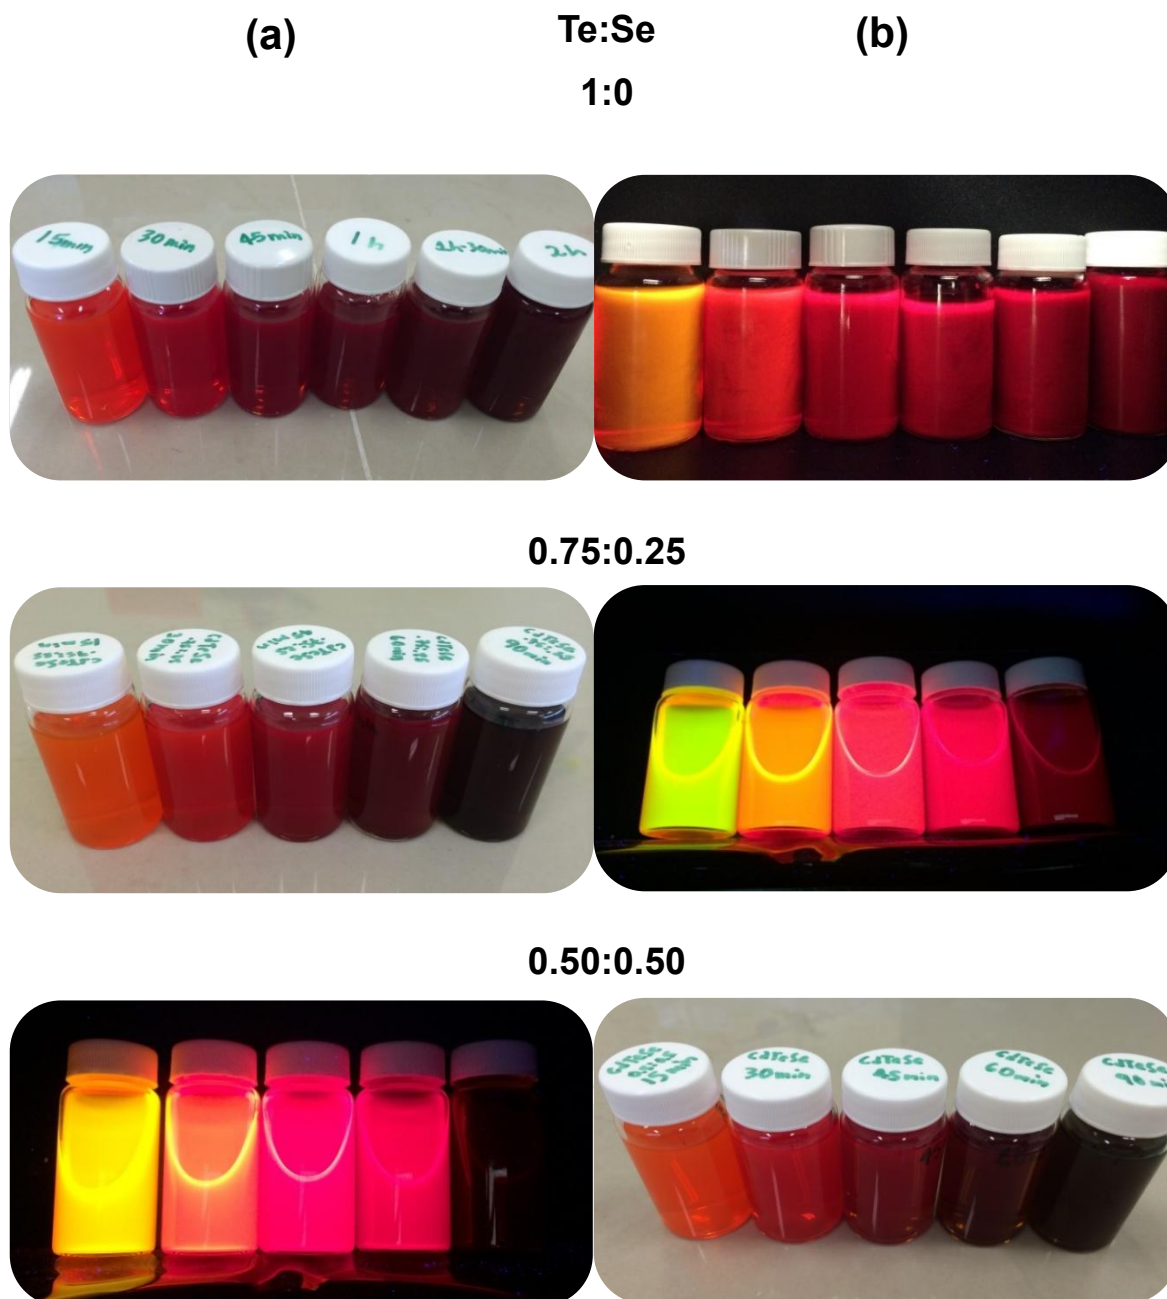

Figure S1. Images of QDs under ambient light and UV light.

**Table S1.** Optical characterization of CdTeSe QDs.

| Molar Ratio<br>Te:Se | Time reaction (min) | d (nm)* | $\lambda_{em}$<br>(nm) | QY |
|----------------------|---------------------|---------|------------------------|----|
| 1:0                  | 15                  | 2.42    | 554                    | 26 |
|                      | 30                  | 3.09    | 594                    | 49 |
|                      | 45                  | 3.58    | 628                    | 55 |
|                      | 60                  | 3.59    | 663                    | 59 |
|                      | 90                  | 3.61    | 668                    | 53 |
|                      | 120                 | 3.66    | 674                    | 55 |
| 0.75:0.25            | 15                  | 2.85    | 569                    | 21 |
|                      | 30                  | 3.38    | 626                    | 51 |
|                      | 45                  | 3.63    | 636                    | 73 |
|                      | 60                  | 3.82    | 671                    | 84 |
|                      | 90                  | 3.96    | 704                    | 46 |
| 0.50:0.50            | 15                  | 2.96    | 580                    | 31 |
|                      | 30                  | 3.48    | 629                    | 53 |
|                      | 45                  | 3.67    | 657                    | 73 |
|                      | 60                  | 3.96    | 680                    | 80 |
|                      | 90                  | 4.28    | 724                    | 11 |

\* Diameter was estimated using the absorption peaks and the empirical equation previously reported by Peng [1].

[1] Yu, W.W.; Qu, L.H.; Guo, W.Z.; Peng, X.G. Experimental determination of the extinction coefficient of CdTe, CdSe and CdS nanocrystals. *Chem. Mater.* **2003**, *15*, 2854-2860.

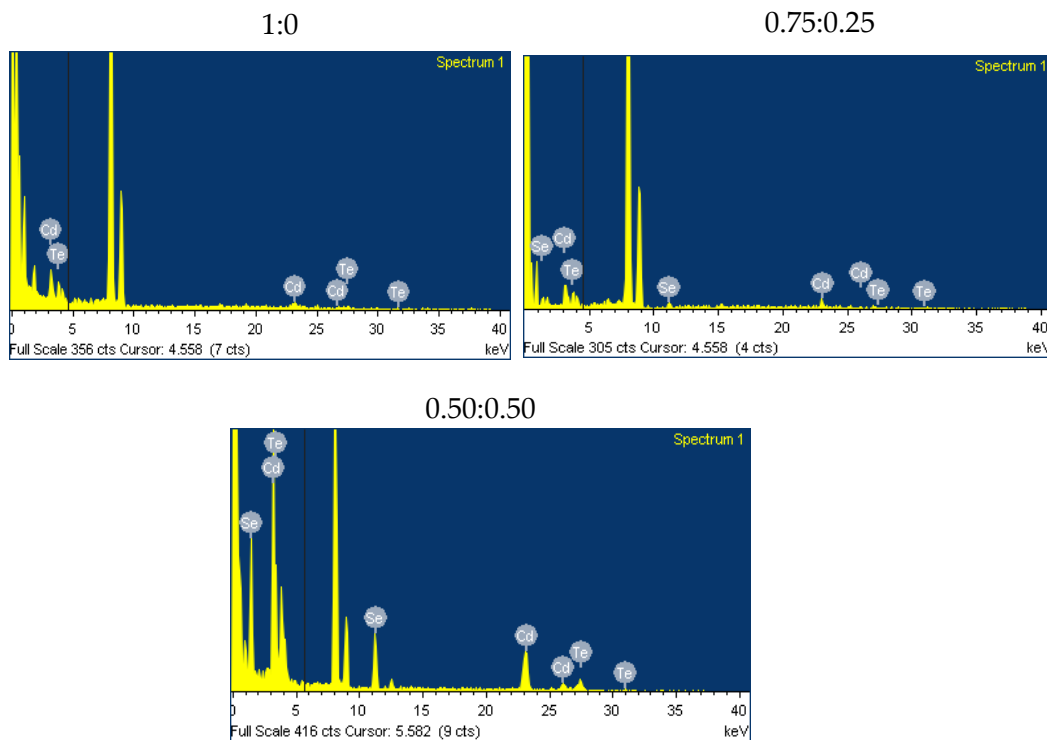

**Figure S2.** EDS spectra of CdTeSe QDs at different molar ratio Te:Se (1:0, 0.75:0.25, 0.50:0.50) and time reaction of 60 min.

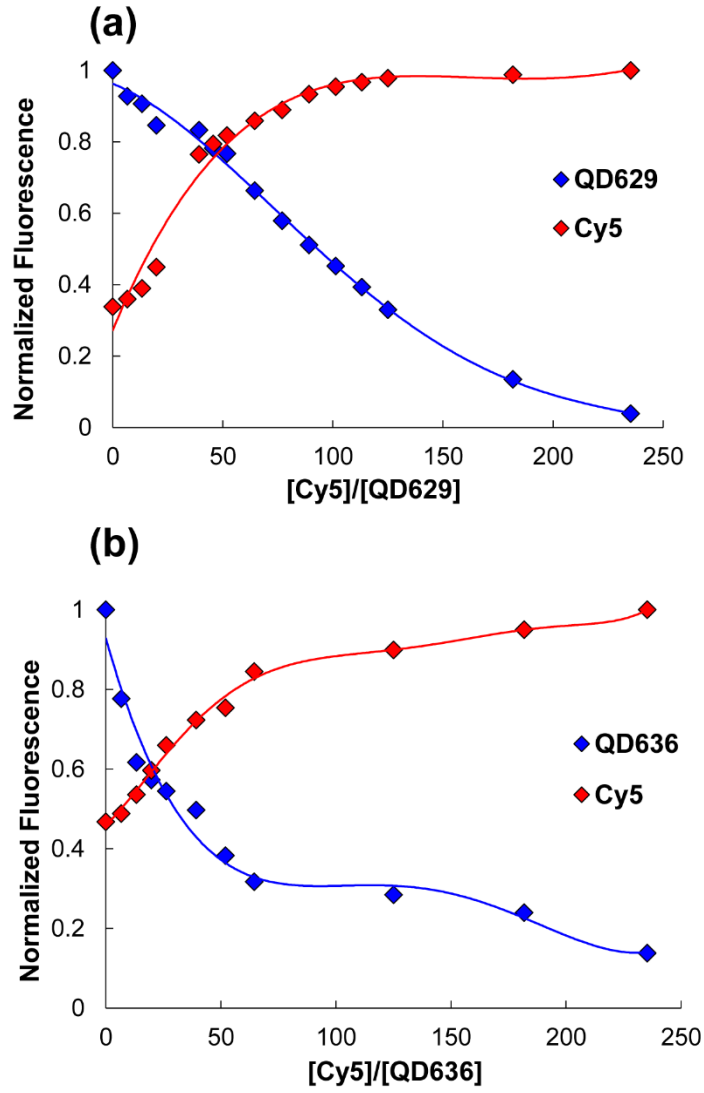

**Figure S3.** Experimental values for the donor relative PL intensity decay (red line) and acceptor PL intensity gain (blue line) versus molar ratio [Cy5]/[QD].

### FRET calculations

**FRET efficiency (E):**

$$E = 1 - \frac{F_{DA}}{F_D} = \frac{R_0^6}{R_0^6 + r^6} \quad (S1)$$

where  $F_{DA}$  is the integrated donor fluorescence in the presence of the acceptor and  $F_D$  is the integrated donor fluorescence alone,  $R_0$  is the Förster distance, which is the

separation distance that yields 50 % energy transfer efficiency and  $r$  is the distance between donor and acceptor.

**Förster distance ( $R_0$ ):**

$$R_0^6 = 8.79 \times 10^{-25} K^2 n^{-4} \phi J(\lambda) \quad (S2)$$

where  $K^2$  is the dipole orientation factor (for random orientation;  $2/3$ ),  $n$  is the refractive index of the medium,  $\phi$  is the fluorescence quantum yield of the donor in the absence of acceptor and  $J(\lambda)$  is the integral of the spectral overlap.

**Overlap Integral  $J(\lambda)$ :**

$$J(\lambda) = \int_0^\infty F_D(\lambda) \varepsilon_A(\lambda) \lambda^4 d\lambda \quad (S3)$$

The overlap integral is a quantitative measure of the donor-acceptor spectral overlap over all wavelengths  $\lambda$ ;  $F_D(\lambda)$  is the fluorescence intensity of the fluorescence donor at given wavelength, and  $\varepsilon_A(\lambda)$  is the molar absorptivity of the acceptor at given wavelength.

**Binding constant ( $K$ ):**

Stern-Volmer modified (static quenching) equation,

$$\frac{1}{F_0 - F} = \frac{1}{F_0} + \frac{1}{KF_0[Q]} \quad (S4)$$

where  $F_0$  is the fluorescence intensity in the absence of the quencher and  $F$  is the fluorescence intensity in presence of quencher,  $[Q]$  is quencher concentration and  $K$  is the binding constant of donor-acceptor conjugate.
